# Supplementary material for: Human Excreta and Food Waste of a Typical Rural Area in China: Characteristics and Co-Fermentation
Source: MDPI journal article supplement (doi:10.3390/ijerph19084731), 2022-04-14
Supplement: s1 [file s1]

## Supplementary Materials

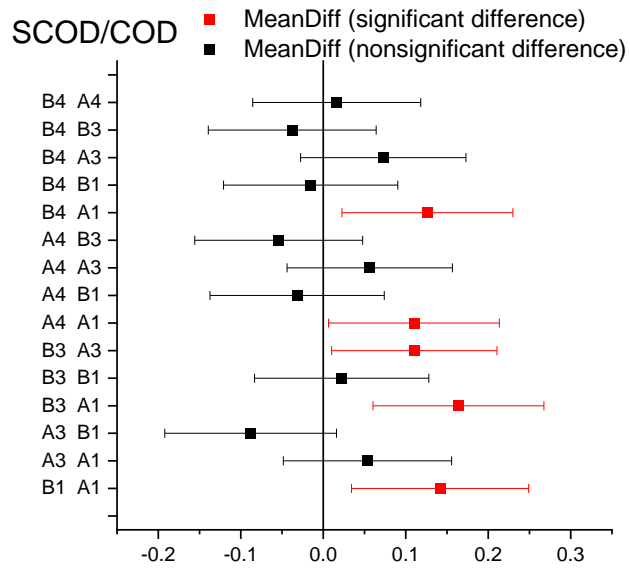

**Figure S1.** The significance between different compartment for same and different reactor for the ratio SCOD/COD.

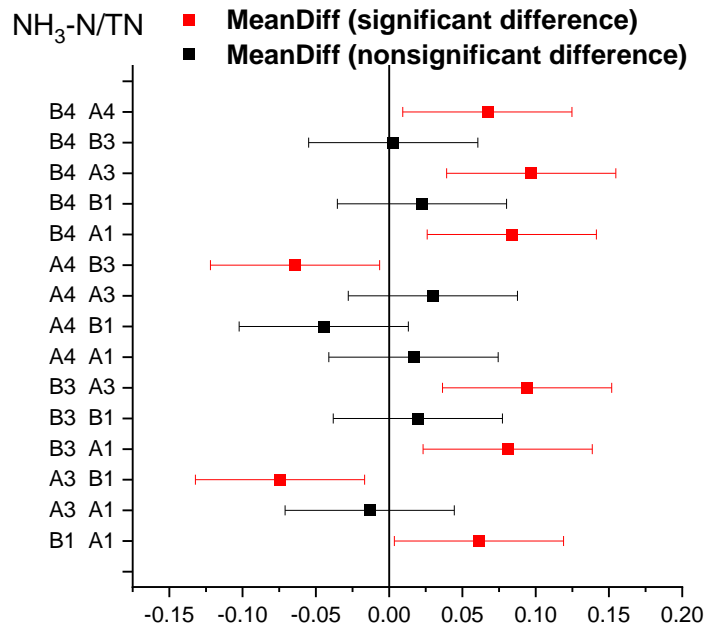

**Figure S2.** The significance between different compartment for same and different reactor for the ratio NH<sub>3</sub>-N/TN.

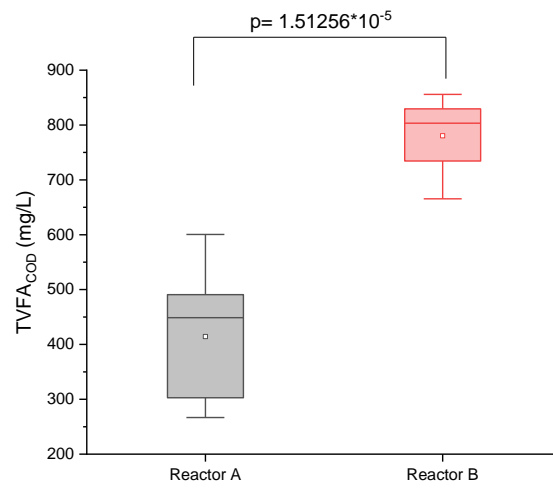

**Figure S3.** TVFA<sub>cod</sub> mean value statistic.

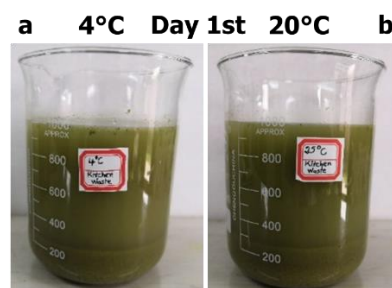

**Figure S4.** Appearance variation of samples at different temperatures and at 1st day, (a) 4 °C, (b) 20 °C.
